# Supplementary material
Source: PubMed Central journal article supplement (PMC6202573)

Supplementary Table 1. Summary of demographics and baseline characteristics of the cross-sectional MRI multiple sclerosis cohorts stratified by African Americans and Caucasians Americans.

| Cross-sectional cohort                                      | African Americans | Caucasian Americans | p-value            |
|-------------------------------------------------------------|-------------------|---------------------|--------------------|
|                                                             | n=32              | n=64                |                    |
| Average age, years (SD)                                     | 33.7 (13.4)       | 37.5 (11.0)         | 0.261 <sup>a</sup> |
| Female, n (%)                                               | 25 (78.1%)        | 50 (78.1%)          | 1 <sup>b</sup>     |
| MS subtype:                                                 |                   |                     | 0.496 <sup>c</sup> |
| RRMS, n (%)                                                 | 29 (90.6%)        | 53 (82.8%)          |                    |
| PPMS, n (%)                                                 | 2 (6.3%)          | 5 (7.8%)            |                    |
| SPMS, n (%)                                                 | 1 (3.1%)          | 6 (9.4%)            |                    |
| History of optic neuritis, n (%)                            | 23 (71.9%)        | 39 (60.9%)          | 0.291 <sup>b</sup> |
| Disease duration, years (mean, SD)                          | 5.34 (4.7%)       | 5.88 (6.4%)         | 0.938 <sup>a</sup> |
| On DMT (at baseline), n (%)                                 | 22 (68.8%)        | 35 (54.7%)          | 0.186 <sup>b</sup> |
| Acute optic neuritis within 6 months of baseline MRI, n (%) | 10 (31.3%)        | 22 (34.4%)          | 0.759 <sup>b</sup> |
| EDSS, median (Q1-Q3)                                        | 3 (1.50-3.75)     | 2 (1.25-3.50)       | 0.161 <sup>a</sup> |

<sup>a</sup>Wilcoxon rank-sum test; <sup>b</sup>Chi2 test; <sup>c</sup> Fisher's exact test

AA=African Americans, CA=Caucasian Americans, MRI = magnetic resonance imaging, SD= standard deviation, RRMS = relapsing-remitting multiple sclerosis, PPMS= primary progressive multiple sclerosis, SPMS= secondary progressive multiple sclerosis, EDSS=expanded disability status scale, Q1 = first quartile, Q3 = third quartile.

Supplementary Table 2. Demographics of the OCT healthy control cohorts.

|                                | African Americans | Caucasian Americans | p-value            |
|--------------------------------|-------------------|---------------------|--------------------|
| <b>Cross-sectional cohort</b>  | n=31              | n=61                |                    |
| Female, n (%)                  | 25 (80.7%)        | 49 (80.3%)          | 0.971 <sup>a</sup> |
| Average age, years (SD)        | 34.6 (11.0)       | 34.5 (10.6)         | 0.996 <sup>b</sup> |
| <b>Longitudinal cohort</b>     | n=17              | n=33                |                    |
| Female, n (%)                  | 16 (94.1)         | 31 (93.9)           | 0.980 <sup>a</sup> |
| Average age, years (SD)        | 31.2 (9.0)        | 31.1 (8.6)          | 0.949 <sup>b</sup> |
| Follow-up duration, years (SD) | 1.9 (1.4)         | 2.8 (2.4)           | 0.104 <sup>b</sup> |

<sup>a</sup>Chi2 test; <sup>b</sup>Wilcoxon rank-sum test;

OCT = optical coherence tomography, SD= standard deviation

Supplementary Table 3. Comparisons of regional (substructure) atrophy (percentage change/year)<sup>1</sup> of the brain in multiple sclerosis patients including effect estimates and corresponding confidence intervals from models 2-4.

|                            | African American<br>(n=22) |                    | Caucasian Americans<br>(n=60) |                    | AA vs.<br>CA |
|----------------------------|----------------------------|--------------------|-------------------------------|--------------------|--------------|
|                            | %/year                     | (95 % CI)          | %/year                        | (95 % CI)          | p-value      |
| <b>Model 2<sup>1</sup></b> |                            |                    |                               |                    |              |
| Whole Brain                | -0.53%                     | (-0.76% to -0.30%) | -0.30%                        | (-0.39% to -0.21%) | 0.083        |
| Cortical GM                | -0.87%                     | (-1.16% to -0.58%) | -0.46%                        | (-0.58% to -0.34%) | 0.012        |
| Cerebral WM                | -0.69%                     | (-0.96% to -0.41%) | -0.34%                        | (-0.46% to -0.22%) | 0.038        |
| Whole Thalamus             | -1.08%                     | (-1.59% to -0.57%) | -0.71%                        | (-0.96% to -0.45%) | 0.292        |
| Nuclear Thalamus           | -1.50%                     | (-2.03% to -0.97%) | -0.66%                        | (-0.92% to -0.41%) | 0.021        |
| Deep GM                    | -0.95%                     | (-1.27% to -0.63%) | -0.62%                        | (-0.77% to -0.48%) | 0.104        |
| T2 Lesion                  | 10.96%                     | (4.01% to 18.37%)  | 4.67%                         | (1.64% to 7.77%)   | 0.006        |
| <b>Model 3<sup>2</sup></b> |                            |                    |                               |                    |              |
| Whole Brain                | -0.53%                     | (-0.76% to -0.30%) | -0.30%                        | (-0.39% to -0.21%) | 0.080        |
| Cortical GM                | -0.87%                     | (-1.16% to -0.58%) | -0.46%                        | (-0.58% to -0.34%) | 0.012        |

|                            |        |                    |        |                    |       |
|----------------------------|--------|--------------------|--------|--------------------|-------|
| Cerebral WM                | -0.69% | (-0.96% to -0.41%) | -0.34% | (-0.47% to -0.22%) | 0.039 |
| Whole Thalamus             | -1.08% | (-1.59% to -0.57%) | -0.70% | (-0.96% to -0.45%) | 0.283 |
| Nuclear Thalamus           | -1.50% | (-2.03% to -0.97%) | -0.66% | (-0.91% to -0.41%) | 0.020 |
| Deep GM                    | -0.95% | (-1.27% to -0.63%) | -0.63% | (-0.78% to -0.48%) | 0.120 |
| T2 Lesion                  | NA     | NA                 | NA     | NA                 | NA    |
| <b>Model 4<sup>3</sup></b> |        |                    |        |                    |       |
| Whole Brain                | -0.53% | (-0.76% to -0.30%) | -0.30% | (-0.39% to -0.21%) | 0.084 |
| Cortical GM                | -0.87% | (-1.16% to -0.58%) | -0.46% | (-0.58% to -0.34%) | 0.012 |
| Cerebral WM                | -0.69% | (-0.96% to -0.41%) | -0.34% | (-0.46% to -0.22%) | 0.038 |
| Whole Thalamus             | -1.08% | (-1.59% to -0.57%) | -0.71% | (-0.96% to -0.45%) | 0.292 |
| Nuclear Thalamus           | -1.50% | (-2.03% to -0.97%) | -0.66% | (-0.92% to -0.41%) | 0.021 |
| Deep GM                    | -0.95% | (-1.27% to -0.63%) | -0.62% | (-0.77% to -0.48%) | 0.104 |
| T2 Lesion                  | 10.96% | (4.02% to 18.37%)  | 4.65%  | (1.65% to 7.70%)   | 0.006 |

<sup>1</sup> Models adjusted for sex, age at baseline, disease duration and history of optic neuritis. <sup>2</sup> Models adjusted for sex, age at baseline, disease duration, history optic neuritis and rates of lesion accumulation. <sup>3</sup> Models adjusted for sex, age at baseline, disease duration, history of optic neuritis and time since acute optic neuritis (if within 6 months of the baseline MRI).

AA= African Americans, CA= Caucasian Americans, CI= confidence interval, GM=gray matter, WM=white matter.

Supplementary Table 4. Comparisons of regional substructure atrophy coefficients [volume fractions (normalized to intracranial volume) /year]<sup>1</sup> of the brain over time.

| <b>Substructure volume atrophy (cerebral volume fraction/year)</b> |                           |                             |                             |                              |                      |
|--------------------------------------------------------------------|---------------------------|-----------------------------|-----------------------------|------------------------------|----------------------|
|                                                                    | African Americans<br>n=22 |                             | Caucasian Americans<br>n=60 |                              | AA vs CA<br>patients |
|                                                                    | Coefficient               | 95% CI                      | Coefficient                 | 95% CI                       | p-value <sup>1</sup> |
| Whole brain                                                        | -0.0042                   | (-0.0060 to -0.0023)        | -0.0024                     | (-0.0032 to -0.0017)         | 0.091                |
| <b>Cortical GM</b>                                                 | <b>-0.0032</b>            | <b>(-0.0042 to -0.0021)</b> | <b>-0.0017</b>              | <b>(-0.0022 to -0.0013)</b>  | <b>0.015</b>         |
| <b>Cerebral WM</b>                                                 | <b>-0.0018</b>            | <b>(-0.0026 to -0.0011)</b> | <b>-0.0010</b>              | <b>(-0.0013 to -0.0006)</b>  | <b>0.039</b>         |
| Whole thalamus                                                     | -0.0001                   | (-0.0002 to -0.0001)        | -0.0001                     | (-0.0001 to -0.0001)         | 0.290                |
| <b>Nucleus thalamus</b>                                            | <b>-0.0001</b>            | <b>(-0.0002 to -0.0001)</b> | <b>-0.0001</b>              | <b>(-0.0001 to -0.00003)</b> | <b>0.021</b>         |
| Deep GM                                                            | -0.0003                   | (-0.0004 to -0.0002)        | -0.0002                     | (-0.0002 to -0.0002)         | 0.102                |
| <b>T2 Lesion</b>                                                   | <b>0.0006</b>             | <b>(0.0003 to 0.0008)</b>   | <b>0.0002</b>               | <b>(0.0001 to 0.0003)</b>    | <b>0.006</b>         |

<sup>1</sup> Models adjusted for sex and age at baseline.

AA= African Americans, CA= Caucasian Americans, CI= confidence interval, GM=gray matter, WM=white matter.



Supplementary Table 5. Comparisons of retinal layer atrophy (percentage change/year) for Model 2 including effect estimates and confidence intervals in patients with multiple sclerosis

|        | African Americans<br>(n=116) |                    | Caucasian Americans<br>(n=116) |                    | AA vs. CA |
|--------|------------------------------|--------------------|--------------------------------|--------------------|-----------|
|        | %/year                       | 95 % CI            | %/year                         | 95 % CI            | p-value   |
| p-RNFL | -1.09%                       | (-1.30% to -0.88%) | -0.75%                         | (-0.93% to -0.56%) | 0.018     |
| GCIP   | -0.76%                       | (-0.94% to -0.59%) | -0.40%                         | (-0.56% to -0.24%) | 0.009     |
| INL    | -0.29%                       | (-0.37% to -0.22%) | -0.32%                         | (-0.38% to -0.26%) | 0.439     |
| ONL    | -0.27%                       | (-0.36% to -0.18%) | -0.16%                         | (-0.23% to -0.08%) | 0.076     |
| AMT    | -0.29%                       | (-0.37% to -0.23%) | -0.15%                         | (-0.21% to -0.09%) | 0.018     |

<sup>1</sup>Percentage of change derived by the natural logarithm of each variable and adjusted for sex, age at baseline, disease duration and history of optic neuritis.

Supplementary Table 6. Comparisons of retinal layer atrophy ( $\mu\text{m}/\text{year}$ ).

| Retinal layer atrophy ( $\mu\text{m}/\text{year}$ ) |                           |                         |                  |                           |                         |                  |                      |
|-----------------------------------------------------|---------------------------|-------------------------|------------------|---------------------------|-------------------------|------------------|----------------------|
|                                                     | African Americans         |                         |                  | Caucasian Americans       |                         |                  | AA vs CA             |
|                                                     | $\mu\text{m}/\text{year}$ | 95% CI                  | p-value          | $\mu\text{m}/\text{year}$ | 95% CI                  | p-value          | p-value <sup>1</sup> |
| <b>Healthy controls</b>                             | n=17                      |                         |                  | n=33                      |                         |                  |                      |
| p-RNFL                                              | -0.48                     | (-1.02 to 0.06)         | 0.080            | -0.34                     | (-0.62 to -0.06)        | 0.017            | 0.648                |
| GCIP                                                | -0.28                     | (-0.55 to -0.01)        | 0.043            | -0.10                     | (-0.26 to 0.06)         | 0.211            | 0.272                |
| INL                                                 | -0.15                     | (-0.27 to -0.03)        | 0.019            | -0.09                     | (-0.16 to -0.01)        | 0.020            | 0.383                |
| ONL                                                 | -0.12                     | (-0.31 to 0.06)         | 0.184            | -0.12                     | (-0.21 to 0.02)         | 0.019            | 0.927                |
| AMT                                                 | -0.42                     | (-1.04 to 0.19)         | 0.181            | -0.25                     | (-0.61 to 0.11)         | 0.172            | 0.632                |
| <b>Multiple sclerosis</b>                           | n=116                     |                         |                  | n=116                     |                         |                  |                      |
| <b>p-RNFL</b>                                       | <b>-0.90</b>              | <b>(-1.07 to -0.73)</b> | <b>&lt;0.001</b> | <b>-0.63</b>              | <b>(-0.78 to -0.49)</b> | <b>&lt;0.001</b> | <b>0.019</b>         |
| <b>GCIP</b>                                         | <b>-0.48</b>              | <b>(-0.59 to -0.37)</b> | <b>&lt;0.001</b> | <b>-0.28</b>              | <b>(-0.38 to -0.18)</b> | <b>&lt;0.001</b> | <b>0.009</b>         |
| INL                                                 | -0.13                     | (-0.16 to -0.09)        | <0.001           | -0.14                     | (-0.17 to -0.11)        | <0.001           | 0.444                |
| ONL                                                 | -0.18                     | (-0.24 to -0.12)        | <0.001           | -0.10                     | (-0.16 to -0.05)        | <0.001           | 0.076                |
| <b>AMT</b>                                          | <b>-0.87</b>              | <b>(-1.08 to -0.66)</b> | <b>&lt;0.001</b> | <b>-0.45</b>              | <b>(-0.64 to -0.26)</b> | <b>&lt;0.001</b> | <b>0.003</b>         |

<sup>1</sup> Models adjusted for sex and age at baseline

AA=African Americans, CA=Caucasian Americans, CI= confidence interval, p-RNFL=peripapillary retinal nerve fiber layer, GCIP =ganglion cell + inner plexiform layer, INL =inner nuclear layer, ONL =outer nuclear layer, AMT =average macular thickness

Supplementary figure 1. Segmentation results of a macular B-scan acquired with Cirrus-HD OCT device. This technique detects the boundaries between the layers and identifies the different retinal layers: Retinal nerve fiber layer (RNFL), ganglion cell layer + inner plexiform layer (GCIP), inner nuclear layer (INL), outer plexiform layer (OPL), outer nuclear layer (ONL), inner photoreceptor segment (IPS), outer photoreceptor segment (OPS), retinal pigment epithelium (RPE).

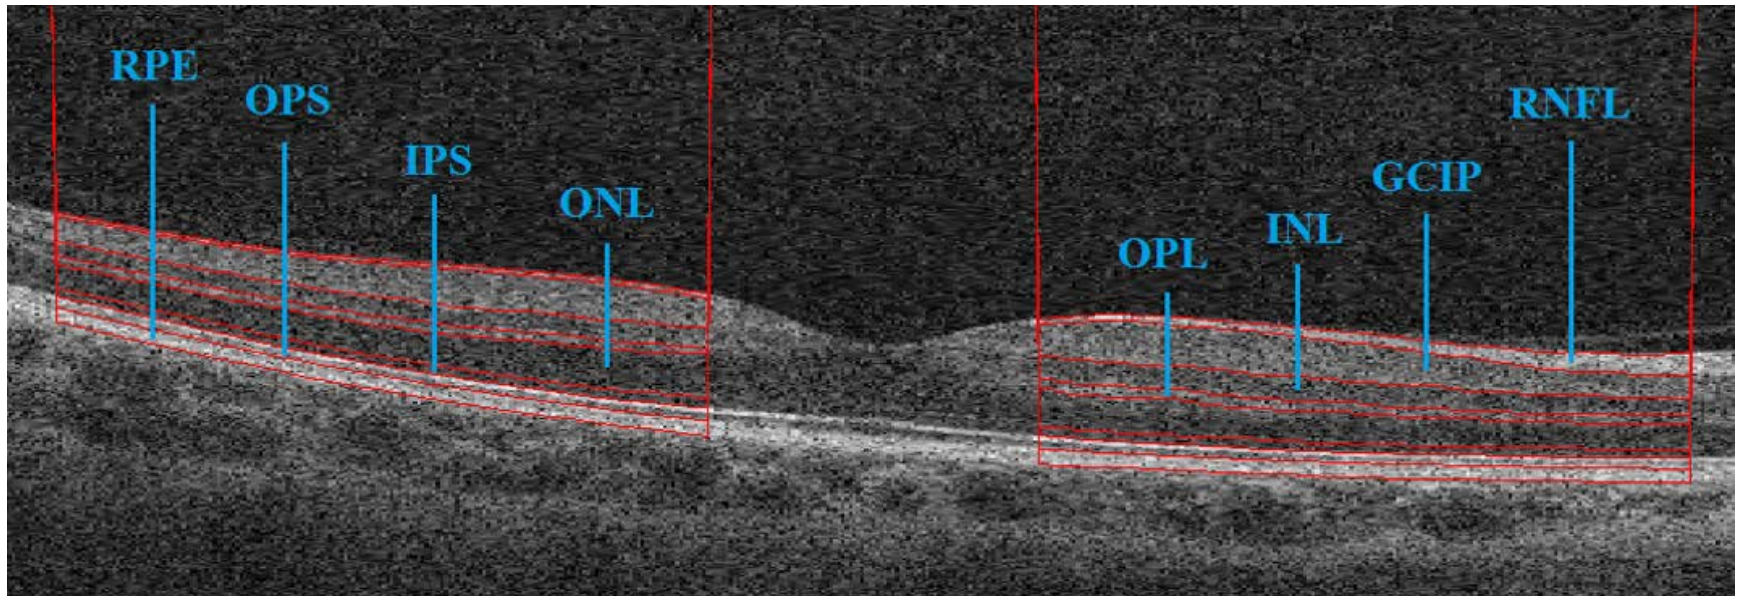

Supplement: awy245_suppl_data.pdf [file awy245_suppl_data.pdf]
